# Supplementary material for: Coordinated Control of Single-Phase End-Users for Phase Load Balancing in Active Electric Distribution Networks
Source: Preprints.org preprint supplement (doi:10.20944/preprints202109.0442.v1), 2021-09-27
Supplement: Supplementary file 1 [file supplementary]

## Sheet: Current Profiles
Hour	a	b	c	a	b	c	a	b	c	a	b	c	a	b	c	a	b	c	a	b	c	a	b	c	a	b	c	a	b	c	a	b	c	a	b	c	a	b	c	a	b	c	a	b	c	a	b	c	a
1	0	0.21878	0	0.963348	0	0	0	0.437559	0	0	0.583241	0	0	0.437559	0	0	0.27683	0	0	0	0.27683	0	0	0.21878	0	0	0.656339	0	0.27683	0	0.21878	0.21878	0.21878	0	0	0.21878	0	0	0.55366	0.875118	0	0	0.240581	0	0	0.21878	0	0	0.656339
2	0	0.211677	0	0.882233	0	0	0	0.423355	0	0	0.563122	0	0	0.423355	0	0	0.27462	0	0	0	0.27462	0	0	0.211677	0	0	0.635032	0	0.27462	0	0.211677	0.211677	0.211677	0	0	0.211677	0	0	0.54924	0.846709	0	0	0.213833	0	0	0.211677	0	0	0.635032
3	0	0.201237	0	0.827824	0	0	0	0.402474	0	0	0.539561	0	0	0.402474	0	0	0.271355	0	0	0	0.271355	0	0	0.201237	0	0	0.603711	0	0.271355	0	0.201237	0.201237	0.201237	0	0	0.201237	0	0	0.54271	0.804949	0	0	0.193446	0	0	0.201237	0	0	0.603711
4	0	0.199413	0	0.862404	0	0	0	0.398827	0	0	0.550727	0	0	0.398827	0	0	0.257251	0	0	0	0.257251	0	0	0.199413	0	0	0.59824	0	0.257251	0	0.199413	0.199413	0.199413	0	0	0.199413	0	0	0.514502	0.797653	0	0	0.195738	0	0	0.199413	0	0	0.59824
5	0	0.21495	0	0.88215	0	0	0	0.4299	0	0	0.543513	0	0	0.4299	0	0	0.247967	0	0	0	0.247967	0	0	0.21495	0	0	0.64485	0	0.247967	0	0.21495	0.21495	0.21495	0	0	0.21495	0	0	0.495934	0.8598	0	0	0.189552	0	0	0.21495	0	0	0.64485
6	0	0.215835	0	0.775597	0	0	0	0.431669	0	0	0.463282	0	0	0.431669	0	0	0.198533	0	0	0	0.198533	0	0	0.215835	0	0	0.647504	0	0.198533	0	0.215835	0.215835	0.215835	0	0	0.215835	0	0	0.397065	0.863338	0	0	0.172844	0	0	0.215835	0	0	0.647504
7	0	0.252576	0	0.956885	0	0	0	0.505152	0	0	0.75272	0	0	0.505152	0	0	0.206168	0	0	0	0.206168	0	0	0.252576	0	0	0.757729	0	0.206168	0	0.252576	0.252576	0.252576	0	0	0.252576	0	0	0.412335	1.0103	0	0	0.20461	0	0	0.252576	0	0	0.757729
8	0	0.271948	0	1.20004	0	0	0	0.543896	0	0	0.925288	0	0	0.543896	0	0	0.204234	0	0	0	0.204234	0	0	0.271948	0	0	0.815844	0	0.204234	0	0.271948	0.271948	0.271948	0	0	0.271948	0	0	0.408468	1.08779	0	0	0.234687	0	0	0.271948	0	0	0.815844
9	0	0.279403	0	1.1587	0	0	0	0.558806	0	0	0.918534	0	0	0.558806	0	0	0.23249	0	0	0	0.23249	0	0	0.279403	0	0	0.83821	0	0.23249	0	0.279403	0.279403	0.279403	0	0	0.279403	0	0	0.46498	1.11761	0	0	0.24178	0	0	0.279403	0	0	0.83821
10	0	0.267492	0	1.03438	0	0	0	0.534984	0	0	0.79475	0	0	0.534984	0	0	0.260292	0	0	0	0.260292	0	0	0.267492	0	0	0.802476	0	0.260292	0	0.267492	0.267492	0.267492	0	0	0.267492	0	0	0.520585	1.06997	0	0	0.24086	0	0	0.267492	0	0	0.802476
11	0	0.279025	0	0.97561	0	0	0	0.558051	0	0	0.858033	0	0	0.558051	0	0	0.289993	0	0	0	0.289993	0	0	0.279025	0	0	0.837076	0	0.289993	0	0.279025	0.279025	0.279025	0	0	0.279025	0	0	0.579986	1.1161	0	0	0.265055	0	0	0.279025	0	0	0.837076
12	0	0.243139	0	0.897229	0	0	0	0.486279	0	0	0.794864	0	0	0.486279	0	0	0.261226	0	0	0	0.261226	0	0	0.243139	0	0	0.729418	0	0.261226	0	0.243139	0.243139	0.243139	0	0	0.243139	0	0	0.522451	0.972557	0	0	0.244196	0	0	0.243139	0	0	0.729418
13	0	0.249015	0	1.01452	0	0	0	0.498029	0	0	0.802239	0	0	0.498029	0	0	0.283336	0	0	0	0.283336	0	0	0.249015	0	0	0.747044	0	0.283336	0	0.249015	0.249015	0.249015	0	0	0.249015	0	0	0.566672	0.996059	0	0	0.257578	0	0	0.249015	0	0	0.747044
14	0	0.262551	0	0.994997	0	0	0	0.525103	0	0	0.763546	0	0	0.525103	0	0	0.294818	0	0	0	0.294818	0	0	0.262551	0	0	0.787654	0	0.294818	0	0.262551	0.262551	0.262551	0	0	0.262551	0	0	0.589637	1.05021	0	0	0.262183	0	0	0.262551	0	0	0.787654
15	0	0.262086	0	1.00385	0	0	0	0.524171	0	0	0.753078	0	0	0.524171	0	0	0.273651	0	0	0	0.273651	0	0	0.262086	0	0	0.786257	0	0.273651	0	0.262086	0.262086	0.262086	0	0	0.262086	0	0	0.547302	1.04834	0	0	0.276116	0	0	0.262086	0	0	0.786257
16	0	0.249354	0	0.882455	0	0	0	0.498709	0	0	0.647471	0	0	0.498709	0	0	0.290151	0	0	0	0.290151	0	0	0.249354	0	0	0.748063	0	0.290151	0	0.249354	0.249354	0.249354	0	0	0.249354	0	0	0.580302	0.997417	0	0	0.238698	0	0	0.249354	0	0	0.748063
17	0	0.276675	0	1.13822	0	0	0	0.553349	0	0	0.75318	0	0	0.553349	0	0	0.242289	0	0	0	0.242289	0	0	0.276675	0	0	0.830024	0	0.242289	0	0.276675	0.276675	0.276675	0	0	0.276675	0	0	0.484578	1.1067	0	0	0.280933	0	0	0.276675	0	0	0.830024
18	0	0.319231	0	1.21487	0	0	0	0.638461	0	0	0.912134	0	0	0.638461	0	0	0.266866	0	0	0	0.266866	0	0	0.319231	0	0	0.957692	0	0.266866	0	0.319231	0.319231	0.319231	0	0	0.319231	0	0	0.533731	1.27692	0	0	0.324336	0	0	0.319231	0	0	0.957692
19	0	0.309843	0	1.15652	0	0	0	0.619685	0	0	0.916725	0	0	0.619685	0	0	0.256751	0	0	0	0.256751	0	0	0.309843	0	0	0.929528	0	0.256751	0	0.309843	0.309843	0.309843	0	0	0.309843	0	0	0.513502	1.23937	0	0	0.323101	0	0	0.309843	0	0	0.929528
20	0	0.293215	0	1.19091	0	0	0	0.58643	0	0	0.956102	0	0	0.58643	0	0	0.23368	0	0	0	0.23368	0	0	0.293215	0	0	0.879645	0	0.23368	0	0.293215	0.293215	0.293215	0	0	0.293215	0	0	0.467359	1.17286	0	0	0.314137	0	0	0.293215	0	0	0.879645
21	0	0.330005	0	1.36536	0	0	0	0.66001	0	0	1.21986	0	0	0.66001	0	0	0.267448	0	0	0	0.267448	0	0	0.330005	0	0	0.990014	0	0.267448	0	0.330005	0.330005	0.330005	0	0	0.330005	0	0	0.534895	1.32002	0	0	0.369021	0	0	0.330005	0	0	0.990014
22	0	0.369021	0	1.60702	0	0	0	0.738042	0	0	1.23921	0	0	0.738042	0	0	0.366847	0	0	0	0.366847	0	0	0.369021	0	0	1.10706	0	0.366847	0	0.369021	0.369021	0.369021	0	0	0.369021	0	0	0.733694	1.47608	0	0	0.424067	0	0	0.369021	0	0	1.10706
23	0	0.339485	0	1.53549	0	0	0	0.678971	0	0	1.03407	0	0	0.678971	0	0	0.411703	0	0	0	0.411703	0	0	0.339485	0	0	1.01846	0	0.411703	0	0.339485	0.339485	0.339485	0	0	0.339485	0	0	0.823406	1.35794	0	0	0.4173	0	0	0.339485	0	0	1.01846
24	0	0.255288	0	1.07399	0	0	0	0.510576	0	0	0.676189	0	0	0.510576	0	0	0.355154	0	0	0	0.355154	0	0	0.255288	0	0	0.765864	0	0.355154	0	0.255288	0.255288	0.255288	0	0	0.255288	0	0	0.710307	1.02115	0	0	0.276046	0	0	0.255288	0	0	0.765864
[truncated: 293 more columns]
