# Supplementary material for: Coordinated Control of Single-Phase End-Users for Phase Load Balancing in Active Electric Distribution Networks
Source: Preprints.org preprint supplement (doi:10.20944/preprints202109.0442.v1), 2021-09-27
Supplement: Supplementary file 2 [file Additional Data of the Topology.xlsx]

## Sheet: Technical Characterstics
No.	ID Section	Pole i	Pole j	Branch	Phase conductor		Neutral conductor		L [km]
					r0 [ohm/km]	x0 [ohm/km]	r0 [ohm/km]	x0 [ohm/km]
1	1	CPP	P1	MT	0.605	0.05	0.605	0.05	0.04
2	2	P1	P2	MT	0.605	0.05	0.605	0.05	0.04
3	3	P2	P3	MT	0.605	0.05	0.605	0.05	0.04
4	4	P3	P4	MT	0.61	0.298	0.61	0.298	0.04
5	5	P4	P5	MT	0.61	0.298	0.61	0.298	0.04
6	40	P5	P40	MT	0.61	0.298	0.61	0.298	0.04
7	41	P40	P41	MT	0.61	0.298	0.61	0.298	0.04
8	42	P41	P42	MT	0.61	0.298	0.61	0.298	0.04
9	43	P41	P43	MT	0.61	0.298	0.61	0.298	0.04
10	44	P43	P44	MT	0.61	0.298	0.61	0.298	0.04
11	45	P43	P45	MT	0.61	0.298	0.61	0.298	0.04
12	46	P45	P46	MT	0.61	0.298	0.61	0.298	0.04
13	47	P46	P47	MT	0.61	0.298	0.61	0.298	0.04
14	48	P46	P49	MT	0.61	0.298	0.61	0.298	0.04
15	49	P48	P49	MT	0.61	0.298	0.61	0.298	0.04
16	50	P49	P50	MT	0.61	0.298	0.61	0.298	0.04
17	51	P50	P51	MT	0.61	0.298	0.61	0.298	0.04
18	52	P50	P52	MT	0.61	0.298	0.61	0.298	0.04
19	53	P52	P53	MT	0.61	0.298	0.61	0.298	0.04
20	54	P52	P54	MT	0.61	0.298	0.61	0.298	0.04
21	55	P54	P55	MT	0.61	0.298	0.61	0.298	0.04
22	56	P55	P56	MT	0.61	0.298	0.61	0.298	0.04
23	57	P56	P57	MT	0.61	0.298	0.61	0.298	0.04
24	58	P57	P58	MT	0.61	0.298	0.61	0.298	0.04
25	59	P57	P59	MT	0.61	0.298	0.61	0.298	0.04
26	60	P59	P60	MT	0.61	0.298	0.61	0.298	0.04
27	61	P59	P61	MT	0.61	0.298	0.61	0.298	0.04
28	62	P61	P62	MT	0.61	0.298	0.61	0.298	0.04
29	63	P61	P63	MT	0.61	0.298	0.61	0.298	0.04
30	64	P63	P64	MT	0.61	0.298	0.61	0.298	0.04
31	65	P64	P65	MT	0.61	0.298	0.61	0.298	0.04
32	66	P64	P66	MT	0.61	0.298	0.61	0.298	0.04
33	67	P66	P67	MT	1.285	0.319	1.921	0.334	0.04
34	68	P67	P68	MT	1.285	0.319	1.921	0.334	0.04
35	69	P64	P69	MT	0.61	0.298	0.61	0.298	0.04
36	70	P69	P70	MT	0.61	0.298	0.61	0.298	0.04
37	71	P69	P71	MT	0.61	0.298	0.61	0.298	0.04
38	72	P71	P72	MT	0.61	0.298	0.61	0.298	0.04
39	73	P72	P73	MT	0.61	0.298	0.61	0.298	0.04
40	74	P72	P74	MT	0.61	0.298	0.61	0.298	0.04
41	75	P74	P75	MT	0.61	0.298	0.61	0.298	0.04
42	76	P74	P76	MT	0.61	0.298	0.61	0.298	0.04
43	77	P76	P77	MT	0.61	0.298	0.61	0.298	0.04
44	78	P76	P78	MT	0.61	0.298	0.61	0.298	0.04
45	79	P78	P79	MT	0.61	0.298	0.61	0.298	0.04
46	80	P79	P80	MT	0.61	0.298	0.61	0.298	0.04
47	81	P79	P81	MT	0.61	0.298	0.61	0.298	0.04
48	82	P81	P82	MT	0.61	0.298	0.61	0.298	0.04
49	83	P82	P83	MT	0.61	0.298	0.61	0.298	0.04
50	84	P83	P84	MT	0.61	0.298	0.61	0.298	0.04
51	85	P84	P85	MT	0.61	0.298	0.61	0.298	0.04
52	86	P85	P86	MT	0.61	0.298	0.61	0.298	0.04
53	87	P86	P87	MT	0.61	0.298	0.61	0.298	0.04
54	88	P87	P88	MT	0.61	0.298	0.61	0.298	0.04
55	6	P5	P6	LB	0.61	0.298	0.61	0.298	0.04
56	7	P6	P7	LB	0.61	0.298	0.61	0.298	0.04
57	8	P7	P8	LB	0.61	0.298	0.61	0.298	0.04
58	9	P8	P9	LB	0.857	0.309	0.857	0.309	0.04
59	10	P9	P10	LB	0.857	0.309	0.857	0.309	0.04
60	11	P10	P11	LB	0.857	0.309	0.857	0.309	0.04
61	12	P11	P12	LB	0.857	0.309	0.857	0.309	0.04
62	13	P12	P13	LB	0.857	0.309	0.857	0.309	0.04
63	14	P13	P14	LB	0.857	0.309	0.857	0.309	0.04
64	15	P14	P15	LB	0.857	0.309	0.857	0.309	0.04
65	16	P14	P16	LB	0.857	0.309	0.857	0.309	0.04
66	17	P16	P17	LB	0.857	0.309	0.857	0.309	0.04
67	18	P13	P18	LB	0.857	0.309	0.857	0.309	0.04
68	19	P18	P19	LB	0.857	0.309	0.857	0.309	0.04
69	20	P19	P20	LB	0.857	0.309	0.857	0.309	0.04
70	21	P8	P21	LB	0.857	0.309	0.857	0.309	0.04
71	22	P21	P22	LB	0.857	0.309	0.857	0.309	0.04
72	23	P22	P23	LB	0.857	0.309	0.857	0.309	0.04
73	24	P23	P24	LB	0.857	0.309	0.857	0.309	0.04
74	25	P24	P25	LB	0.857	0.309	0.857	0.309	0.04
75	26	P23	P26	LB	0.857	0.309	0.857	0.309	0.04
76	27	P26	P27	LB	0.857	0.309	0.857	0.309	0.04
77	28	P27	P28	LB	0.857	0.309	0.857	0.309	0.04
78	29	P28	P29	LB	0.857	0.309	0.857	0.309	0.04
79	30	P29	P30	LB	0.857	0.309	0.857	0.309	0.04
80	31	P30	P31	LB	0.857	0.309	0.857	0.309	0.04
81	32	P31	P32	LB	0.857	0.309	0.857	0.309	0.04
82	33	P29	P33	LB	1.285	0.319	1.285	0.319	0.04
83	34	P33	P34	LB	1.285	0.319	1.285	0.319	0.04
84	35	P34	P35	LB	1.285	0.319	1.285	0.319	0.04
85	36	P35	P36	LB	1.285	0.319	1.285	0.319	0.04
86	37	P36	P37	LB	1.285	0.319	1.285	0.319	0.04
87	38	P37	P38	LB	1.285	0.319	1.285	0.319	0.04
88	39	P38	P39	LB	1.285	0.319	1.285	0.319	0.04
