# Supplementary material for: Coordinated Control of Single-Phase End-Users for Phase Load Balancing in Active Electric Distribution Networks
Source: Preprints.org preprint supplement (doi:10.20944/preprints202109.0442.v1), 2021-09-27
Supplement: Supplementary file 4 [file Switching Operations Matrix.xlsx]

## Sheet: Switching Operation Matrix
End-User	Branch	Pole	H0	H1	H2	H3	H4	H5	H6	H7	H8	H9	H10	H11	H12	H13	H14	H15	H16	H17	H18	H19	H20	H21	H22	H23	H24
CONS1	MT	P1	b	c	b	b	b	b	c	c	b	a	b	c	b	a	a	c	a	c	a	a	b	b	c	a	a
CONS2	MT	P2	a	a	a	a	a	c	b	a	c	b	a	a	c	c	c	a	c	a	b	c	c	c	a	c	c
CONS3	MT	P3	b	b	c	c	c	a	a	b	a	c	c	b	a	b	b	b	b	b	c	b	a	b	b	b	b
CONS4	MT	P4	b	c	b	b	b	b	c	c	b	a	b	c	b	a	a	c	a	c	a	a	b	a	c	a	a
CONS5	MT	P5	b	b	c	c	c	a	a	b	a	c	c	b	a	b	b	b	b	b	c	b	a	b	b	b	b
PROS3	MT	P40	b	a	a	a	c	b	c	a	a	a	a	c	b	a	c	a	b	a	a	a	c	b	b	c	a
PROS4	MT	P40	b	b	c	c	b	c	b	b	a	b	b	b	a	b	a	c	a	b	c	c	a	a	a	b	c
CONS57	MT	P41	a	a	a	a	c	b	b	a	c	c	c	a	b	a	c	a	b	a	a	a	c	b	a	b	a
CONS58	MT	P41	a	a	a	a	c	b	c	b	c	c	c	c	b	a	c	a	b	a	a	a	c	a	b	b	a
CONS59	MT	P41	b	a	a	a	c	b	b	b	c	c	c	a	b	a	c	a	b	a	a	a	a	a	a	b	a
CONS60	MT	P42	a	a	a	a	c	b	b	a	c	c	c	c	b	a	c	a	b	a	a	a	c	b	a	b	a
CONS61	MT	P42	b	a	a	a	c	b	c	b	c	c	c	c	b	a	c	a	b	a	a	a	a	a	b	b	a
CONS62	MT	P43	c	a	a	a	c	b	c	b	c	c	c	c	b	a	c	a	b	a	a	a	c	a	a	b	a
CONS63	MT	P45	b	a	a	a	c	b	b	a	c	c	c	c	b	a	c	a	b	a	a	a	c	b	a	b	a
PROS5	MT	P45	b	c	b	b	a	a	a	c	c	c	c	b	a	a	a	b	c	c	b	b	b	c	c	a	b
CONS64	MT	P46	b	a	a	a	c	b	c	a	b	b	b	b	b	c	a	b	b	c	b	b	b	a	c	a	a
CONS65	MT	P47	b	a	a	a	c	a	a	c	b	b	b	c	b	a	c	b	b	c	b	b	b	b	c	a	a
CONS66	MT	P47	b	a	a	a	a	a	a	c	b	b	b	c	b	a	c	a	b	c	a	a	c	a	a	a	a
CONS67	MT	P47	b	a	a	a	c	a	c	a	b	b	b	b	a	b	a	b	b	c	b	b	b	b	c	a	a
PROS6	MT	P47	b	c	b	b	a	b	c	c	a	a	a	a	a	b	b	a	c	a	a	a	c	a	a	b	b
PROS7	MT	P47	b	b	c	c	b	c	b	b	b	b	b	a	c	a	b	c	a	b	c	c	a	c	b	c	c
CONS68	MT	P48	b	b	c	c	b	c	c	b	c	c	c	b	a	c	a	c	a	b	c	c	a	c	b	c	c
PROS8	MT	P51	a	a	a	a	a	a	c	c	c	c	c	b	b	c	c	a	b	c	a	a	c	a	a	a	a
CONS69	MT	P52	b	b	c	c	b	c	c	b	b	c	a	c	c	c	b	c	a	b	c	c	a	c	b	c	c
CONS70	MT	P52	b	a	a	a	a	a	c	c	b	a	a	c	a	b	b	a	b	c	a	a	a	c	b	c	a
CONS71	MT	P53	b	a	a	a	a	a	b	c	a	b	a	a	a	b	a	a	b	c	a	a	a	c	b	c	a
CONS72	MT	P55	c	a	a	a	a	a	c	c	b	b	a	c	a	b	a	a	b	c	a	a	a	c	b	c	a
CONS73	MT	P56	a	a	a	a	a	a	b	c	b	b	a	a	a	b	b	a	b	c	a	a	a	c	b	c	a
CONS74	MT	P58	b	b	c	c	b	c	a	b	c	b	a	b	c	b	c	c	a	b	c	c	c	a	a	a	c
CONS75	MT	P59	b	b	c	c	b	c	c	c	a	b	a	a	c	b	c	c	a	b	c	c	c	a	a	a	c
CONS76	MT	P59	a	a	a	a	a	a	b	b	a	b	a	c	a	b	b	a	b	c	a	a	a	c	b	c	a
PROS9	MT	P59	b	c	b	b	c	b	a	a	a	b	a	b	b	b	a	b	c	a	b	b	b	b	c	b	b
CONS77	MT	P60	b	b	c	b	b	b	a	a	c	a	b	b	b	c	a	b	c	c	b	b	b	b	a	a	c
CONS78	MT	P60	b	c	b	c	c	c	c	c	b	c	c	a	c	a	c	c	a	b	c	c	c	a	c	c	b
CONS79	MT	P61	b	a	a	a	a	a	b	b	a	b	c	c	a	b	b	a	b	a	a	a	a	c	b	a	a
CONS80	MT	P61	b	b	c	b	b	b	c	c	b	a	a	b	b	c	a	b	c	c	b	b	b	b	a	b	c
CONS81	MT	P62	a	c	b	c	c	c	a	a	c	c	b	a	c	a	c	c	a	b	c	c	c	a	c	c	b
CONS82	MT	P62	b	b	c	b	b	b	c	c	c	c	b	b	b	a	a	b	c	c	b	b	b	b	a	b	c
CONS83	MT	P63	b	a	a	a	a	a	b	b	a	b	a	c	a	b	b	a	b	a	a	a	a	c	b	a	a
CONS84	MT	P65	b	c	b	c	c	c	a	a	b	a	b	a	c	c	c	c	a	b	c	c	c	a	c	c	b
CONS85	MT	P68	b	c	b	c	c	c	a	a	b	c	a	a	c	b	c	c	a	b	c	c	c	a	c	c	b
CONS86	MT	P70	b	b	c	b	b	b	c	c	c	b	b	b	b	a	a	b	c	c	b	b	b	b	b	a	c
CONS87	MT	P71	a	a	a	a	a	a	c	b	c	a	b	c	a	c	b	a	b	a	a	a	a	c	a	b	a
CONS88	MT	P71	b	c	b	b	b	b	b	c	a	a	b	b	b	a	a	b	c	c	b	b	b	b	b	c	b
CONS89	MT	P71	b	b	c	c	c	c	a	a	b	b	a	a	c	a	c	c	a	b	c	c	c	a	c	a	c
CONS90	MT	P71	b	a	a	a	a	a	b	b	a	a	a	c	a	c	b	a	b	a	a	a	a	c	a	b	a
CONS91	MT	P72	b	c	b	b	b	a	c	c	a	a	b	b	b	c	a	b	b	c	a	a	a	a	b	c	b
CONS92	MT	P73	b	c	c	c	c	c	c	a	a	a	b	c	c	c	b	c	a	b	a	a	a	a	b	c	c
CONS93	MT	P75	b	a	a	c	c	c	c	b	b	b	b	a	a	c	c	a	c	a	a	a	a	a	a	b	a
CONS94	MT	P75	b	a	a	a	a	b	b	b	b	b	a	a	a	a	c	a	c	a	b	b	b	b	a	b	a
CONS95	MT	P76	a	b	b	b	b	a	a	c	a	a	a	b	b	a	a	b	b	c	c	c	c	c	c	a	b
CONS96	MT	P77	a	c	c	a	a	b	b	a	b	b	b	c	c	c	b	c	a	b	b	b	b	b	b	c	c
CONS97	MT	P80	a	c	c	a	a	a	a	c	b	b	b	c	b	a	c	c	a	b	b	b	b	b	b	c	c
CONS98	MT	P80	c	c	c	a	a	a	c	b	a	a	a	a	a	c	a	c	a	b	b	b	b	b	b	c	c
PROS10	MT	P81	a	a	a	c	c	c	a	a	a	a	a	a	b	c	a	a	c	a	a	a	a	a	a	a	a
CONS99	MT	P82	a	c	c	a	a	a	b	c	b	b	b	c	b	a	c	c	a	b	b	b	b	b	b	c	c
CONS100	MT	P82	b	b	b	b	b	b	b	c	b	b	b	c	a	a	c	b	b	c	c	c	c	c	c	b	b
CONS101	MT	P85	b	c	c	c	c	c	b	b	b	b	b	c	c	c	c	c	c	b	b	b	b	b	b	c	c
CONS012	MT	P86	b	c	c	c	c	c	c	c	c	c	c	c	c	c	c	c	c	c	c	c	c	c	c	c	c
CONS103	MT	P86	b	a	a	a	a	a	a	a	a	a	a	a	a	a	a	a	a	a	a	a	a	a	a	a	a
CONS104	MT	P88	a	b	b	b	b	b	b	b	b	b	b	b	b	b	b	b	b	b	b	b	b	b	b	b	b
CONS6	LB	P6	b	a	a	a	a	c	b	c	b	a	a	a	c	c	c	a	c	a	b	c	b	a	a	c	c
CONS7	LB	P6	c	c	b	b	b	b	a	b	c	b	c	b	a	a	b	b	b	a	b	c	b	a	b	a	b
CONS8	LB	P7	c	b	c	c	c	a	c	a	c	b	b	c	b	b	a	c	a	c	a	a	c	c	c	b	a
CONS9	LB	P8	b	b	a	a	a	b	a	b	c	b	c	b	a	b	b	b	b	a	b	c	b	a	b	b	c
CONS10	LB	P9	c	a	c	c	c	c	b	c	a	c	a	a	c	c	c	a	c	b	c	b	a	b	a	c	a
CONS11	LB	P10	abc	abc	abc	abc	abc	abc	abc	abc	abc	abc	abc	abc	abc	abc	abc	abc	abc	abc	abc	abc	abc	abc	abc	abc	abc
CONS12	LB	P11	c	a	c	c	c	c	b	c	a	c	a	a	c	c	c	a	c	b	c	b	a	b	a	c	a
CONS13	LB	P11	c	b	a	a	a	b	a	b	c	b	c	b	a	b	b	b	b	a	b	c	b	a	b	b	c
CONS14	LB	P12	a	c	b	b	b	a	c	a	b	a	b	c	b	a	a	c	a	c	a	a	c	c	c	a	b
CONS15	LB	P13	a	b	a	a	a	b	a	b	c	b	c	b	a	b	b	b	b	a	b	c	b	a	b	c	c
CONS16	LB	P13	a	a	c	c	c	c	b	c	a	c	a	a	c	c	c	a	c	b	c	b	a	b	a	b	a
CONS17	LB	P16	a	b	a	a	a	c	b	c	a	c	a	a	c	c	c	a	b	b	c	b	a	b	a	b	c
CONS18	LB	P16	a	a	c	c	c	b	a	b	c	b	c	b	a	b	b	b	c	a	b	c	b	a	b	c	a
CONS19	LB	P19	c	b	a	a	a	c	b	c	a	c	a	a	c	c	c	a	b	b	c	b	a	b	a	b	c
CONS20	LB	P19	c	c	b	b	b	a	c	a	b	a	b	c	b	a	a	c	a	c	a	a	c	c	c	a	b
CONS21	LB	P20	c	a	a	a	a	c	c	b	b	a	c	c	b	a	c	c	b	a	b	c	b	c	b	b	c
CONS22	LB	P20	c	b	b	b	b	b	a	b	c	b	c	b	a	b	b	b	a	a	b	c	b	a	b	c	b
CONS23	LB	P21	b	c	c	c	c	a	b	c	a	c	b	a	c	c	a	a	c	b	c	b	a	b	a	a	a
CONS24	LB	P21	c	a	a	a	a	c	c	b	b	a	b	c	b	a	c	c	b	a	b	c	b	c	b	b	c
CONS25	LB	P22	c	a	c	c	c	a	c	b	b	a	b	c	c	a	a	c	c	c	b	a	b	c	b	a	a
CONS26	LB	P22	c	b	b	b	b	b	a	a	c	b	c	b	a	b	b	b	a	c	a	a	c	a	c	c	b
CONS27	LB	P23	c	b	b	c	b	b	a	a	c	b	b	b	a	b	b	b	c	a	a	c	c	a	c	c	b
CONS28	LB	P23	c	c	a	a	a	c	b	c	a	c	c	a	b	c	c	a	b	b	c	b	a	b	a	b	c
CONS29	LB	P24	c	a	c	b	c	a	c	b	b	c	c	c	c	a	a	c	a	c	a	c	c	c	c	a	a
CONS30	LB	P25	c	a	c	b	c	b	b	c	c	c	c	a	b	b	c	c	a	c	a	c	a	a	a	b	a
CONS31	LB	P26	c	c	a	a	a	a	a	a	b	c	c	c	c	a	a	a	c	b	b	b	c	b	c	a	c
CONS32	LB	P26	c	c	a	a	a	a	c	b	b	c	c	c	c	a	a	a	b	b	c	b	c	a	c	a	c
CONS33	LB	P26	c	b	b	c	b	c	a	a	a	b	b	b	a	c	b	b	c	a	b	a	b	b	b	c	b
CONS34	LB	P26	c	a	c	b	c	b	b	c	c	b	b	a	b	c	c	c	a	c	a	c	a	c	b	c	b
CONS35	LB	P27	a	a	c	b	c	b	b	c	b	c	c	a	b	a	c	c	a	c	a	c	a	c	b	c	b
CONS36	LB	P27	a	c	a	a	a	a	a	a	b	c	c	c	c	c	a	a	c	b	b	b	c	c	c	a	c
CONS37	LB	P27	a	b	b	c	b	c	c	b	c	b	b	b	a	a	b	b	b	a	c	a	b	a	a	b	a
CONS38	LB	P28	a	b	b	c	b	b	c	b	b	b	b	c	a	a	a	b	b	a	a	c	b	a	c	c	a
CONS39	LB	P28	c	b	c	b	c	c	a	c	c	c	b	c	b	a	b	c	a	a	a	a	a	c	a	c	a
CONS40	LB	P28	c	b	c	b	c	c	a	a	c	c	b	c	c	a	b	c	a	a	a	a	a	c	a	c	a
CONS41	LB	P30	a	b	c	b	c	c	a	b	b	b	b	a	c	a	b	c	a	a	a	b	b	a	a	b	a
PROS1	LB	P30	c	a	b	c	b	b	a	b	c	c	b	c	c	a	b	b	b	c	c	c	a	c	a	b	b
PROS2	LB	P30	a	c	a	a	a	a	a	b	b	b	c	a	a	c	b	a	c	b	b	b	b	a	c	a	c
CONS42	LB	P31	a	c	a	a	a	b	b	c	c	c	a	c	b	b	c	b	b	c	c	c	a	c	c	a	c
CONS43	LB	P32	a	c	a	a	a	b	b	b	c	c	b	c	b	a	c	b	b	c	c	b	a	c	a	b	c
CONS44	LB	P32	a	a	b	c	b	c	a	b	b	b	b	a	c	a	b	c	a	a	a	b	a	c	a	b	b
CONS45	LB	P33	c	a	b	c	b	c	a	b	b	b	a	a	c	a	b	c	a	a	a	b	a	c	a	b	b
CONS46	LB	P33	c	b	c	b	c	a	c	c	a	a	a	b	a	b	a	a	c	b	b	c	b	a	c	a	a
CONS47	LB	P34	c	c	a	a	a	b	b	c	c	c	a	c	a	b	a	a	c	c	c	c	b	a	c	b	c
CONS48	LB	P35	c	b	c	b	c	a	a	b	c	a	a	b	c	a	b	c	b	b	b	b	a	c	a	a	b
CONS49	LB	P36	c	c	b	c	b	a	b	b	c	a	a	c	a	a	b	a	a	a	a	b	b	a	c	b	b
CONS50	LB	P36	c	b	c	c	b	c	c	b	a	c	a	a	c	a	a	a	b	a	b	b	a	c	c	b	b
CONS51	LB	P37	b	a	a	a	c	b	a	c	b	b	a	b	b	a	c	c	a	b	c	c	b	a	a	a	c
CONS52	LB	P37	c	b	c	c	b	c	b	b	c	a	a	c	c	a	b	a	b	a	c	c	a	c	c	b	c
CONS53	LB	P38	c	b	c	c	b	c	a	b	a	b	a	c	c	a	b	c	a	b	c	c	a	a	a	b	c
CONS54	LB	P38	c	b	c	c	b	c	b	c	a	b	a	a	c	a	b	c	a	b	c	c	a	a	a	b	c
CONS55	LB	P38	c	b	c	c	b	c	c	c	a	b	a	a	b	a	c	c	a	b	c	c	a	a	a	b	c
CONS56	LB	P39	c	b	c	c	b	c	b	b	a	b	a	a	c	a	b	c	a	b	c	c	a	a	a	b	c
